# Supplementary material
Source: PubMed Central journal article supplement (PMC2862206)
Supplement: mmc1.pdf [file mmc1.pdf]

Biophysical Journal, Volume 98

**Supporting Material**

**Tissue-specific mathematical models of slow wave entrainment in wild-type and 5-HT<sub>2B</sub> knockout mice with altered interstitial cells of Cajal networks**

Peng Du, Greg O'Grady, Simon J. Gibbons, Rita Yassi, Rachel Lees-Green, Gianrico Farrugia, Leo K. Cheng, and Andrew J. Pullan

**TABLE 1**

| Parameter | Description                                                     | Value                                   |
|-----------|-----------------------------------------------------------------|-----------------------------------------|
| $\beta$   | Modulator of sensitivity of $IP_3$ to $V_m$                     | $2.7 \times 10^{-5} \text{ mM s}^{-1}$  |
| $\eta$    | Rate constant for linear $IP_3$ degradation                     | $0.015 \text{ s}^{-1}$                  |
| U         | Hill coefficient                                                | 4                                       |
| $V_{m4}$  | Maximal rate of voltage dependent $IP_3$ synthesis              | $3.33 \times 10^{-5} \text{ mM s}^{-1}$ |
| $k_4$     | Half saturation constant for the nonlinear $IP_3$ degradation   | 0.0005 mM                               |
| $P_{mV}$  | Maximal rate of voltage dependent $IP_3$ synthesis              | $1.33 \times 10^{-5} \text{ mM s}^{-1}$ |
| $K_v$     | Half saturation constant for voltage dependent $IP_3$ synthesis | -58 mV                                  |
| R         | Hill coefficient                                                | 8                                       |

Table 1. Redimensionalized parameter values of the  $IP_3$  component of the slow wave model by Imtiaz et al.
